# Supplementary material for: Insights into the tectonic evolution of the Svecofennian orogeny based on in situ Lu-Hf dating of garnet from Olkiluoto, SW Finland
Source: Copernicus journal article supplement (doi:10.5194/egusphere-2024-2034), 2024-07-15
Supplement: Supplementary file 1 [file egusphere-2024-2034-supplement.zip]

Archive with 2 entries (2 files):
- Supplementary_Data_Tables.xlsx
- Supplementary_Figures.pdf
