# Supplementary material for: Insights into the tectonic evolution of the Svecofennian orogeny based on in situ Lu-Hf dating of garnet from Olkiluoto, SW Finland
Source: Copernicus journal article supplement (doi:10.5194/egusphere-2024-2034), 2024-07-15
Supplement: Supplementary file 1 [file egusphere-2024-2034-supplement.zip › Supplementary_Figures.pdf]

## Supplementary Figures

Bulk 0 = Si(64.81)Al(16.49)Fe(3.24)Mn(0.05)Mg(1.29)Ca(1.50)Na(4.15)K(8.46)H(0.5)O(167.00)  
 Bulk 1 = Si(64.81)Al(16.49)Fe(3.24)Mn(0.05)Mg(1.29)Ca(1.50)Na(4.15)K(8.46)H(12)O(172.75)

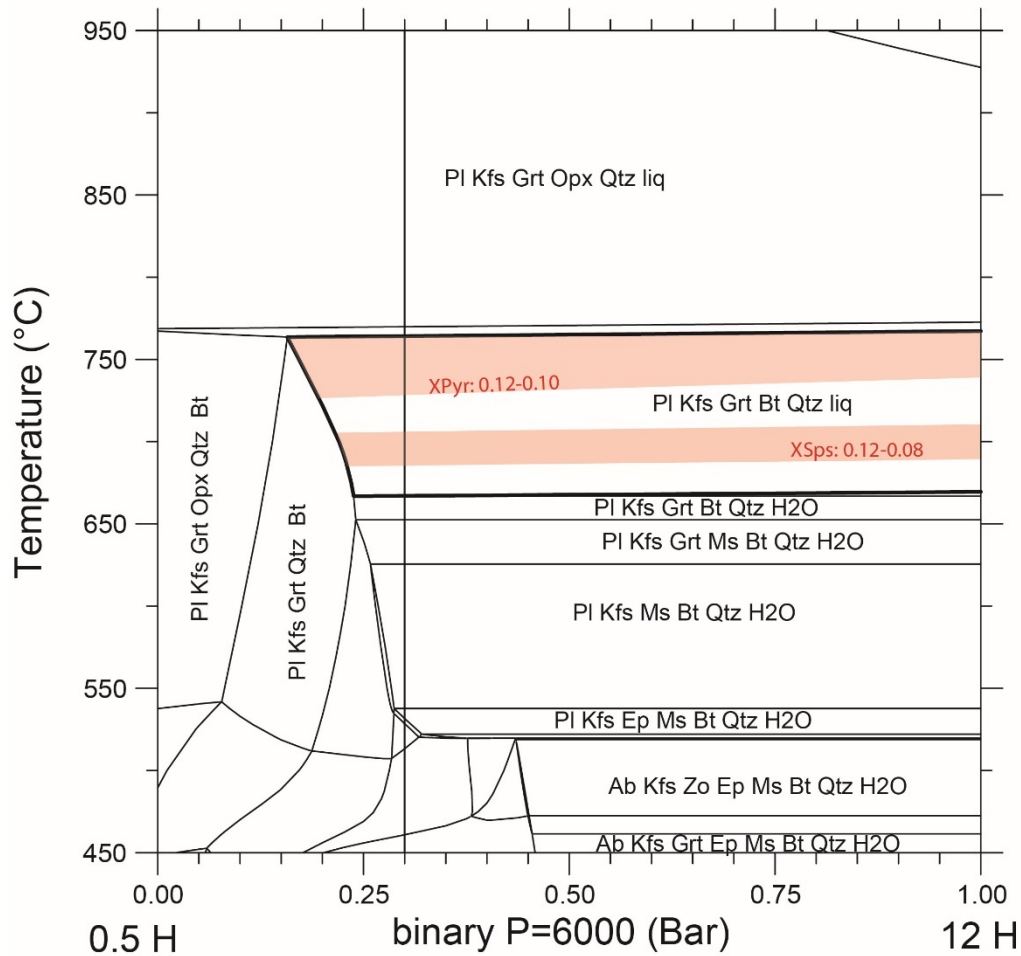

Fig. S1. T-XH<sub>2</sub>O diagram at 6000 bar for sample MM30A. The interpreted peak assemblage of garnet-plagioclase-biotite-K-feldspar-quartz-melt is highlighted in bold. The red fields indicate the X<sub>SpS</sub> and X<sub>Pyr</sub> compositions that are present in the garnet grains of the sample. The bold line indicates the H<sub>2</sub>O value used to calculate the TXCaO and P-T diagrams.

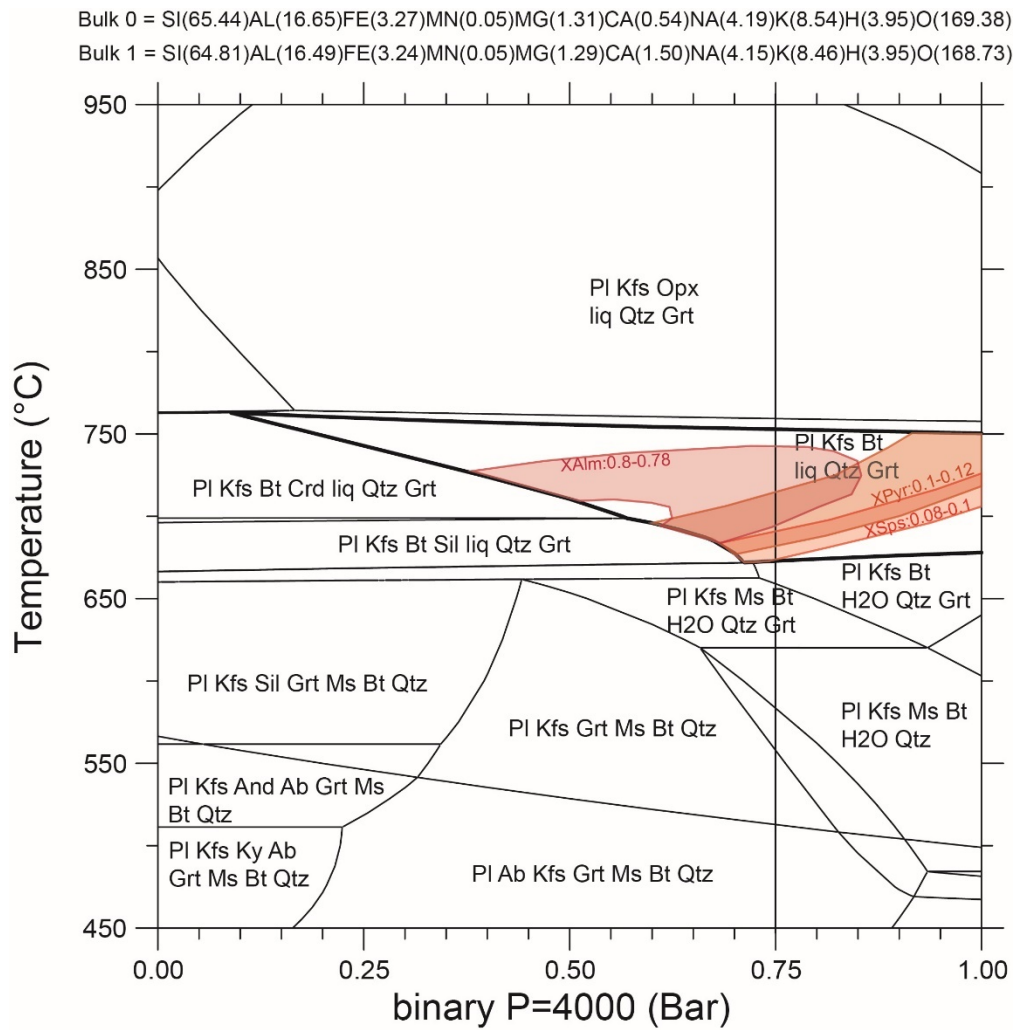

Fig. S2. T-XCaO diagram for sample MM30A at 4000 bar. The interpreted peak assemblage of garnet-plagioclase-biotite-K-feldspar-quartz-melt is highlighted in bold. The red fields indicate the XSps, XPyr and XAlm compositions that are present in the garnet grains of the sample. The bold line indicates the CaO value used to calculate the P-T diagram.

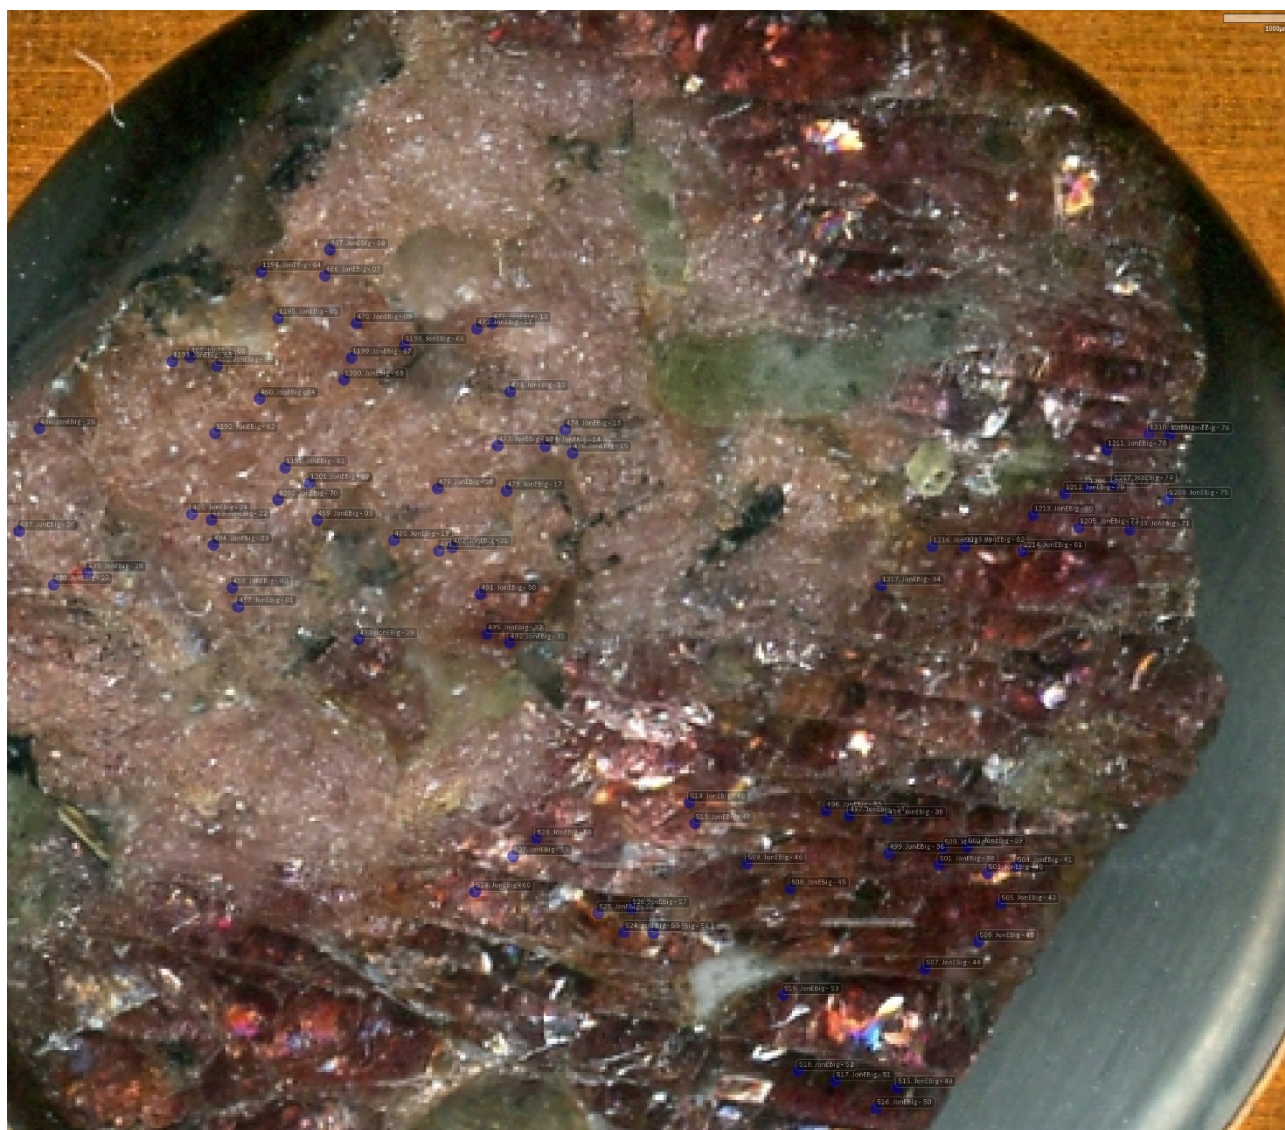

Fig. S3. Lu-Hf spot locations for large garnet.

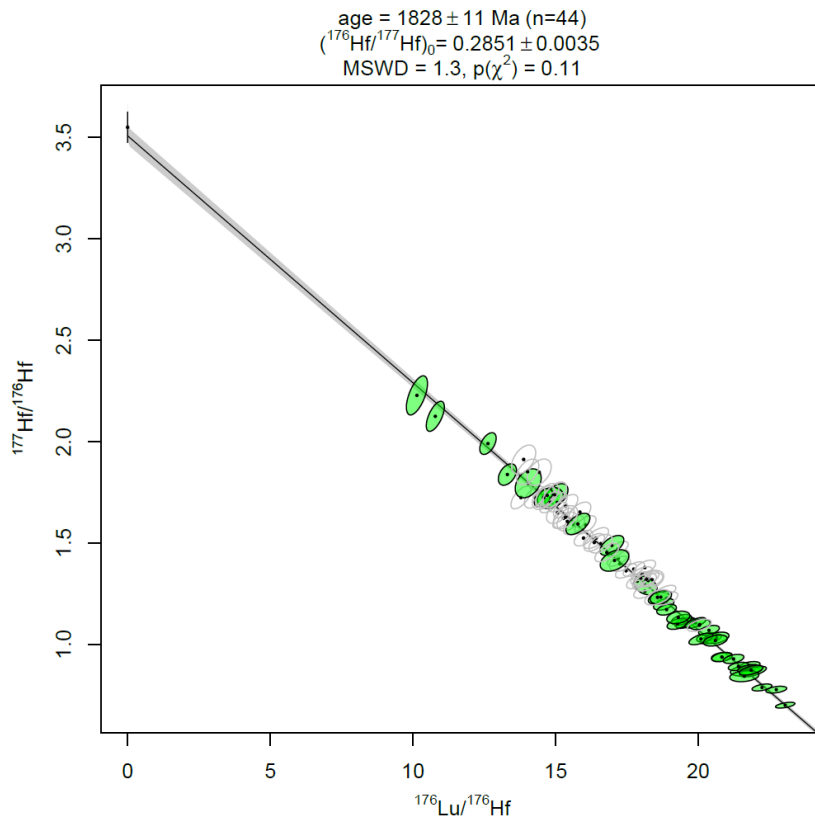

Fig. S4. Calculated Lu-Hf isochron for analyses obtained from the garnet core only.

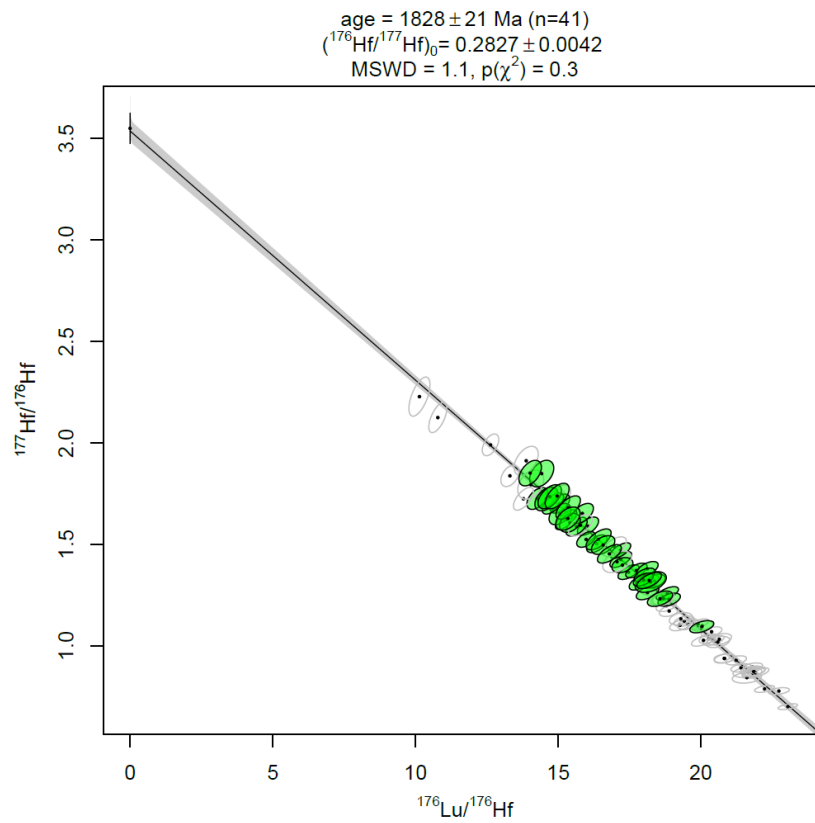

Fig. S5. Calculated Lu-Hf garnet isochron using analyses obtained from the rim only.

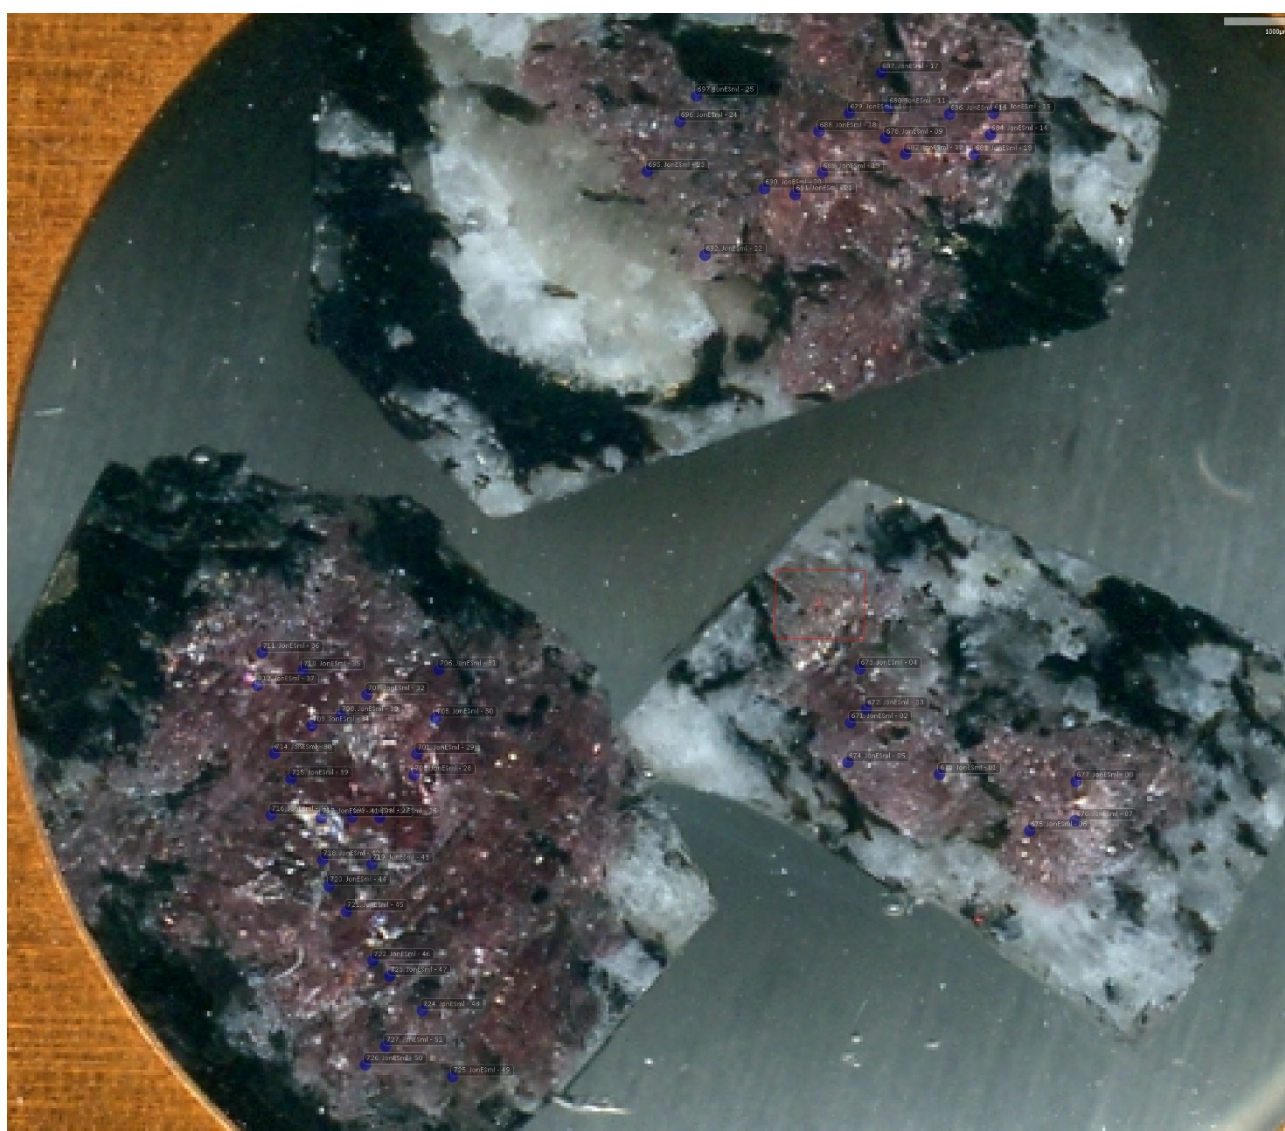

Fig. S6. Lu-Hf spot locations for small garnet.
